# Supplementary material for: Reduction-responsive cross-linked micelles based on PEGylated polypeptides prepared via click chemistry
Source: Royal Society of Chemistry journal article supplement (doi:10.1039/c3py00364g), 2013-01-01
Supplement: c3py00364g.pdf [file c3py00364g.pdf]

## Electronic Supplementary Information:

# Reduction-responsive cross-linked micelles based on PEGylated polypeptides prepared via click chemistry

*Yilong Cheng<sup>a,b</sup>, Chaoliang He<sup>a</sup>, Chunsheng Xiao<sup>a</sup>, Jianxun Ding<sup>a</sup>, Kaixuan Ren<sup>a,b</sup>,  
Shuangjiang Yu<sup>a</sup>, Xiuli Zhuang<sup>a</sup>, Xuesi Chen<sup>\*,a</sup>*

<sup>a</sup> Key Laboratory of Polymer Ecomaterials, Changchun Institute of Applied Chemistry,  
Chinese Academy of Sciences, Changchun 130022, P. R. China

<sup>b</sup> Graduate University of Chinese Academy of Sciences, Beijing 100039, P. R. China

---

\* Corresponding author. Tel: +86 431 8526 2112; Fax: +86 431 8526 2112; E-mail:  
xschen@ciac.jl.cn.

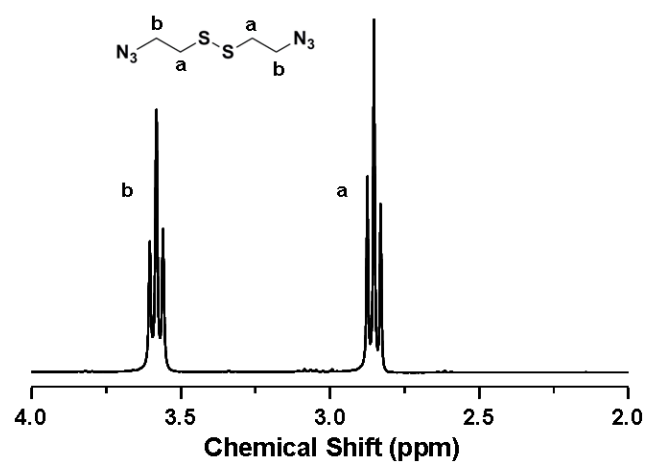

**Figure S1.**  $^1\text{H}$  NMR spectra of bis(2-azidoethyl)disulfide (BADs) in  $\text{CDCl}_3$ .

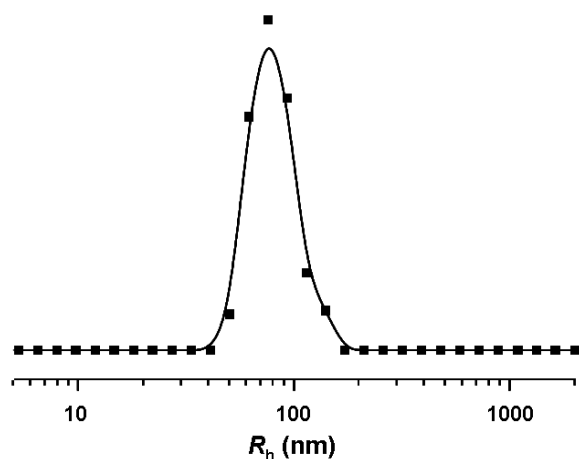

**Figure S2.** Hydrodynamic radii ( $R_h$ ) of CMs in DMF at 20 °C determined by DLS.
